# Supplementary material for: External Validation of the Endoscopic Features of Sessile Serrated Adenomas in Expert and Trainee Colonoscopists
Source: PubMed Central journal article supplement — Clin Endosc. 2016 Sep 13;50(3):279–86. doi: 10.5946/ce.2016.107 (PMC5475520; doi:10.5946/ce.2016.107), 2016-09-13
Supplement: ce-2016-107-supple.pdf [file ce-2016-107-supple.pdf]

**Supplementary Table 1.** Prevalence of Endoscopic Features According to Polyp Histology in the Validation Set

| Variable                   | SSA         | HP          | TA          | p-value <sup>a)</sup> |
|----------------------------|-------------|-------------|-------------|-----------------------|
| Overall                    | 290 (29×10) | 120 (12×10) | 100 (10×10) |                       |
| Indistinctive borders      | 157 (54.1)  | 25 (20.8)   | 4 (4.0)     | <0.001                |
| Irregular shape            | 134 (46.2)  | 22 (18.3)   | 10 (10.0)   | <0.001                |
| Rim of debris              | 105 (36.2)  | 15 (12.5)   | 13 (13.0)   | <0.001                |
| Cloud-like surface         | 95 (32.4)   | 15 (12.5)   | 3 (3.0)     | <0.001                |
| Mucous cap                 | 147 (50.7)  | 12 (10.0)   | 3 (3.0)     | <0.001                |
| Nodular surface            | 69 (23.8)   | 13 (10.8)   | 6 (6.0)     | <0.001                |
| Absence of surface vessels | 141 (48.6)  | 35 (29.2)   | 28 (28.0)   | <0.001                |
| Dark spots                 | 71 (24.5)   | 13 (10.8)   | 3 (3.0)     | <0.001                |
| Expert                     | 116 (29×4)  | 48 (12×4)   | 40 (10×4)   |                       |
| Indistinctive borders      | 67 (57.8)   | 12 (25.0)   | 1 (2.5)     | <0.001                |
| Irregular shape            | 60 (51.7)   | 8 (16.7)    | 5 (12.5)    | <0.001                |
| Rim of debris              | 55 (47.4)   | 9 (18.8)    | 6 (15.0)    | <0.001                |
| Cloud-like surface         | 44 (37.9)   | 6 (12.5)    | 2 (5.0)     | <0.001                |
| Mucous cap                 | 62 (53.4)   | 8 (16.7)    | 1 (2.5)     | <0.001                |
| Nodular surface            | 34 (29.3)   | 5 (10.4)    | 2 (5.0)     | <0.001                |
| Absence of surface vessels | 64 (21.6)   | 20 (41.7)   | 12 (30.0)   | 0.008                 |
| Dark spots                 | 25          | 5 (10.4)    | 1 (2.5)     | 0.004                 |
| Trainee                    | 174 (29×6)  | 72 (12×6)   | 60 (10×6)   |                       |
| Indistinctive borders      | 90 (51.7)   | 13 (18.1)   | 3 (5.0)     | <0.001                |
| Irregular shape            | 74 (42.5)   | 14 (19.4)   | 5 (8.3)     | <0.001                |
| Rim of debris              | 50 (28.7)   | 6 (8.3)     | 7 (11.7)    | <0.001                |
| Cloud-like surface         | 50 (28.7)   | 9 (12.5)    | 1 (1.7)     | <0.001                |
| Mucous cap                 | 85 (48.9)   | 4 (5.6)     | 2 (3.3)     | <0.001                |
| Nodular surface            | 35 (20.1)   | 8 (11.1)    | 4 (6.7)     | 0.008                 |
| Absence of surface vessels | 77 (44.3)   | 15 (20.8)   | 16 (26.7)   | <0.001                |
| Dark spots                 | 46 (26.4)   | 8 (11.1)    | 2 (3.3)     | <0.001                |

Values are presented as number (%).

SSA, sessile serrated adenoma; HP, hyperplastic polyp; TA, tubular adenoma.

<sup>a)</sup>SSAs vs. non-SSAs.
